# Supplementary material
Source: PubMed Central journal article supplement (PMC5653144)
Supplement: Supp_Fig2.pdf [file Supp_Fig2.pdf]

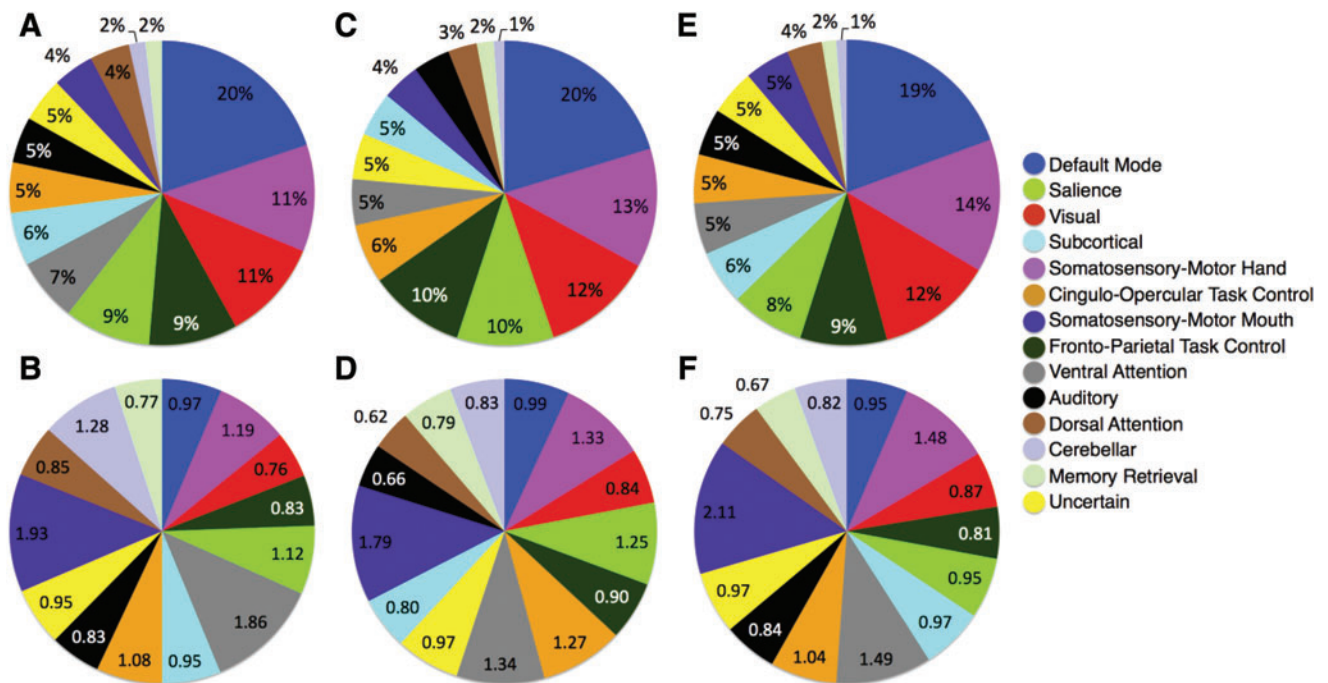

**SUPPLEMENTARY FIG. S2.** Distribution of features sorted by brain network from the most accurate model in each run. (A) Run 1 with 400 features, (B) normalized values for run 1. (C) Run 2 with 308 features, (D) normalized values for run 2. (E) Run 3 with 627 features, (F) normalized values for run 3. Normalized values are the ratio of the final percentage of ROIs belonging to a given network to the initial percentage of ROIs belonging to that network. Overall, the distribution of selected features was consistent between runs. ROI, regions of interest.
