# Supplementary material
Source: PubMed Central journal article supplement (PMC5653144)
Supplement: Supp_Fig3.pdf [file Supp_Fig3.pdf]

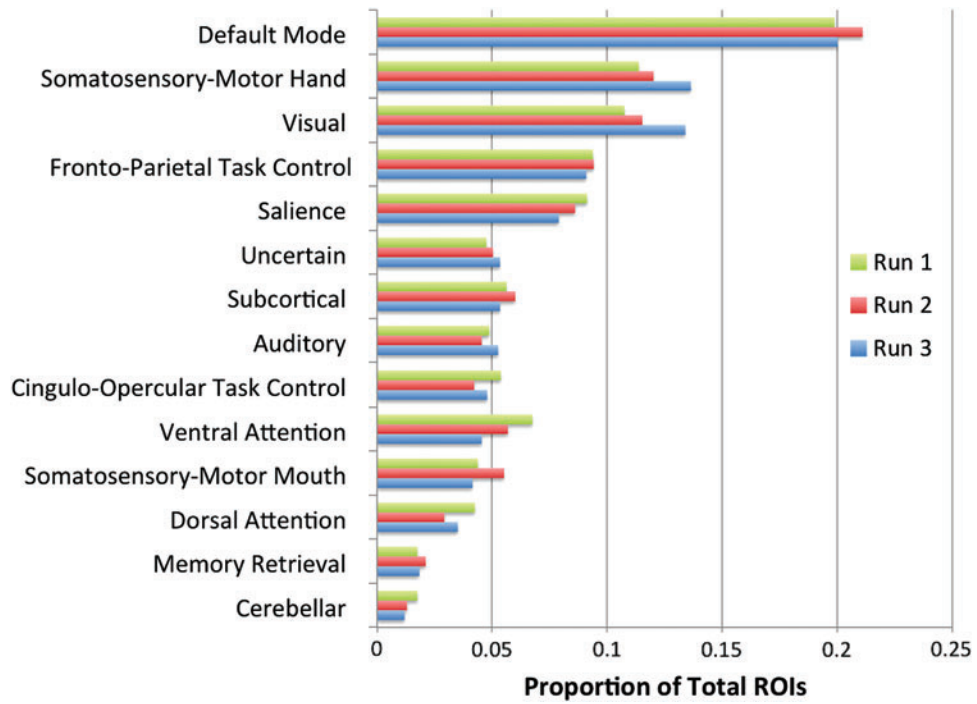

**SUPPLEMENTARY FIG. S3.** Comparison of network participation in features after peak accuracy was reached, broken down by run. There was little variation in brain network percentages across all runs.
