# Supplementary material
Source: PubMed Central journal article supplement (PMC5653144)
Supplement: Supp_Fig4.pdf [file Supp_Fig4.pdf]

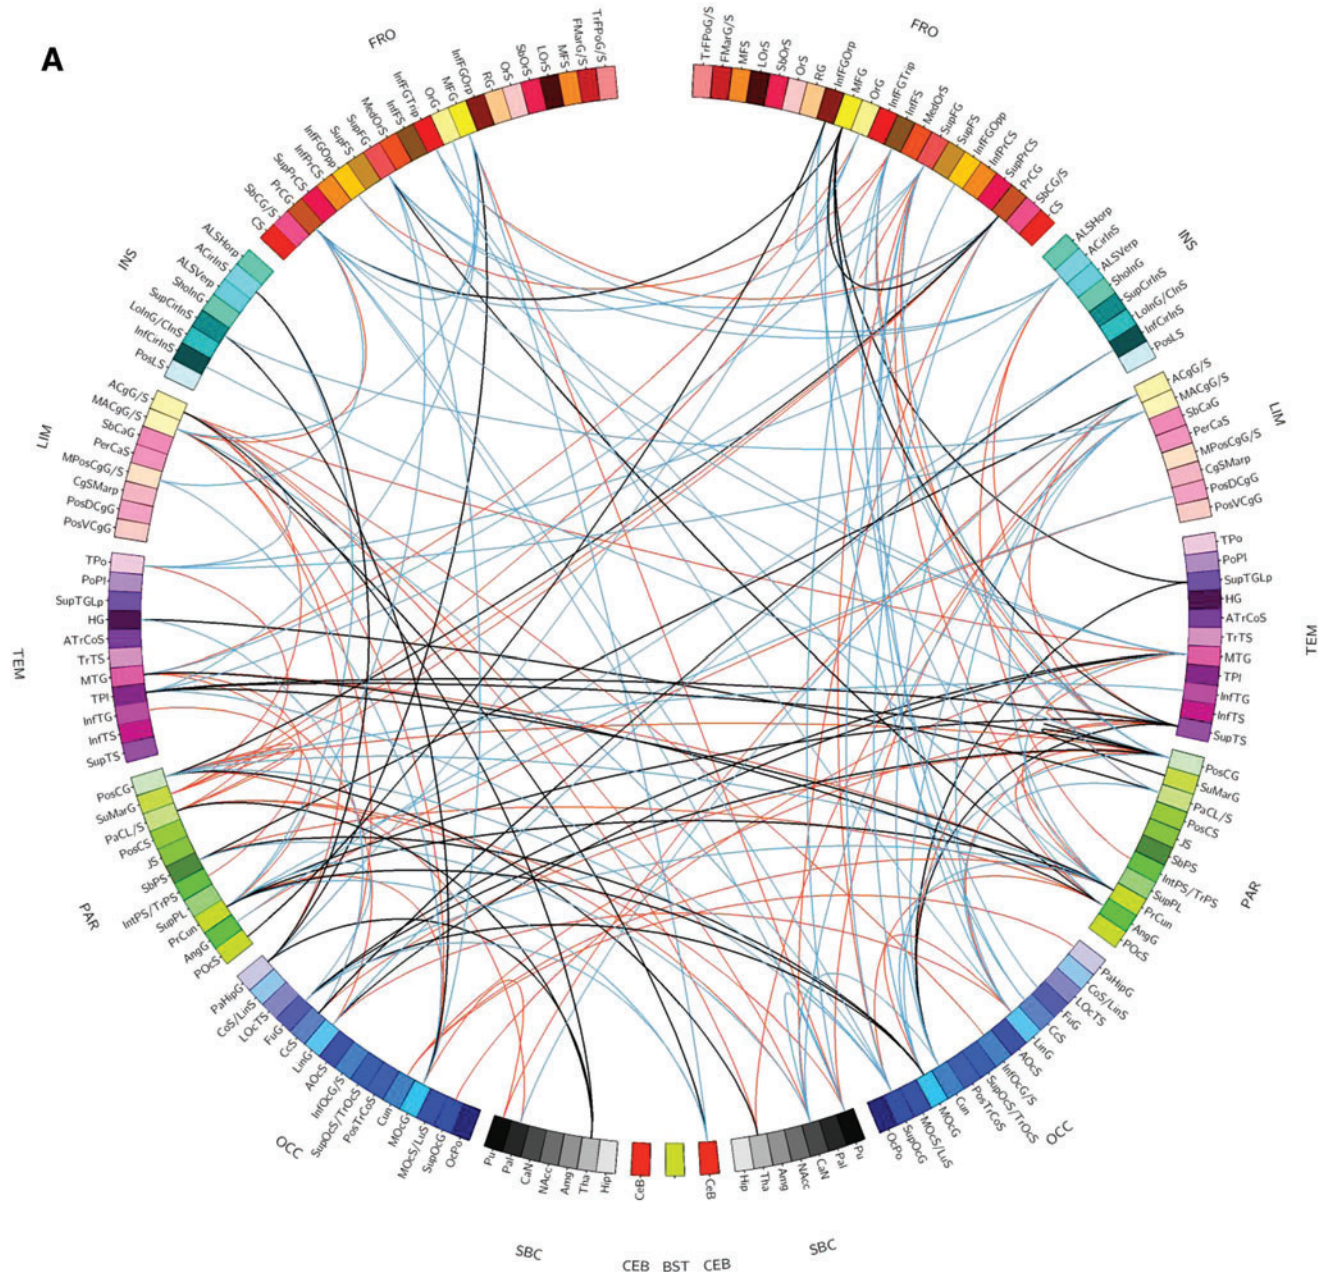

**SUPPLEMENTARY FIG. S4.** (A) Connectogram of 100 most informative features from RF and CRF models. The connections from the RF model were taken from Chen and colleagues (2015). Red connections: RF model only, blue: CRF model only, black: features from both RF and CRF. There were 32 anatomically identical features that were shared by both models with slightly varying degrees of importance depending on the model. (B) The 20 most informative features from RF and CRF using the same color scheme (A). Only four identical features were selected by both RF and CRF. CRF, conditional random forest; RF, random forest.

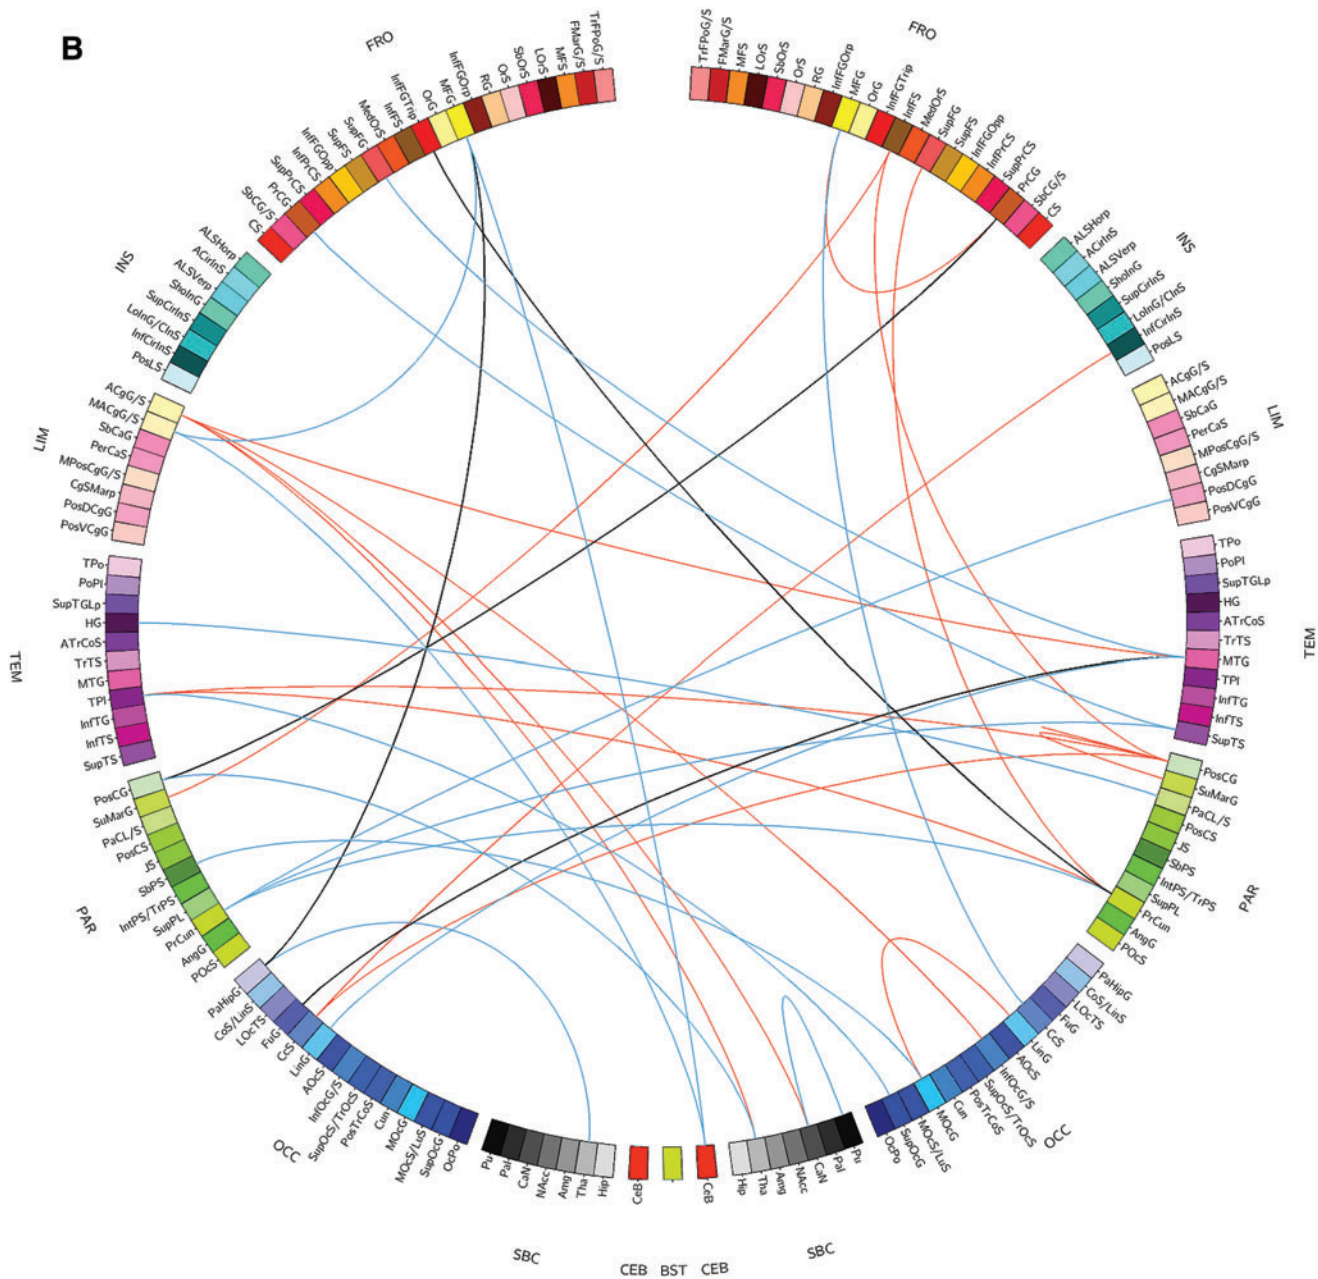

SUPPLEMENTARY FIG. S4. (Continued).
