# Supplementary material
Source: PubMed Central journal article supplement (PMC5653144)
Supplement: Supp_Table2.pdf [file Supp_Table2.pdf]

SUPPLEMENTARY TABLE S2. CRF CLASSIFIERS  
FROM VARIOUS DIMENSIONAL REDUCTION STEPS WERE  
TESTED WITH AN EXTERNAL VALIDATION DATA SET

| <i>Features<br/>in model</i> | <i>CRF<br/>accuracy</i> | <i>CRF<br/>sensitivity</i> | <i>CRF<br/>specificity</i> | <i>RF<br/>accuracy</i> |
|------------------------------|-------------------------|----------------------------|----------------------------|------------------------|
| 1254                         | 0.625                   | 0.500                      | 0.800                      | 0.611                  |
| 627                          | 0.611                   | 0.476                      | 0.800                      | 0.597                  |
| 400                          | 0.569                   | 0.405                      | 0.800                      | 0.583                  |
| 308                          | 0.653                   | 0.548                      | 0.800                      | 0.708                  |
| 200                          | 0.667                   | 0.567                      | 0.800                      | 0.653                  |
| 150                          | 0.597                   | 0.452                      | 0.800                      | 0.597                  |
| 100                          | 0.583                   | 0.452                      | 0.767                      | 0.639                  |
| 70                           | 0.569                   | 0.500                      | 0.667                      | 0.569                  |
| 50                           | 0.625                   | 0.714                      | 0.500                      | 0.611                  |
| 30                           | 0.542                   | 0.619                      | 0.433                      | 0.556                  |
| 20                           | 0.500                   | 0.452                      | 0.567                      | 0.514                  |

Overall classification accuracies are shown in the table. Sensitivity refers to a true positive in which ASD group status was correctly predicted, while specificity refers to a true negative in which TD group status was correctly predicted. Classification was repeated with RF models using the same features remaining after CRF dimensional reduction. Feature sets from the peak accuracy CRF models were used to grow random forests of 20,001 trees. The validation set was then classified using these RF models.

ASD, autism spectrum disorder; CRF, conditional random forest; RF, random forest.
