# Supplementary material
Source: PubMed Central journal article supplement (PMC5653144)
Supplement: Supp_Table3.pdf [file Supp_Table3.pdf]

SUPPLEMENTARY TABLE S3. FEATURES WITH PEAK  
ACCURACY FROM FIVE DIFFERENT SETS  
OF ABIDE PARTITIONED DATA

| <i>Set number</i> | <i>Number of features</i> | <i>Peak accuracy</i> |
|-------------------|---------------------------|----------------------|
| Set 1             | 99                        | 0.62                 |
| Set 2             | 26                        | 0.64                 |
| Set 3             | 101                       | 0.68                 |
| Set 4             | 18, 55                    | 0.62                 |
| Set 5             | 335                       | 0.71                 |

The third column represents RF cross-validation accuracy.
